# Supplementary material for: Gold nanoparticle-enhanced near infrared fluorescent nanocomposites for targeted bio-imaging
Source: Royal Society of Chemistry journal article supplement (doi:10.1039/c4ra12066c), 2014-11-19
Supplement: c4ra12066c1.pdf [file c4ra12066c1.pdf]

## Support Information

### Gold Nanoparticle-Enhanced Near Infrared Fluorescent

### Nanocomposites for Targeted Bio-imaging

Hao Cheng, Chuanxi Wang,\* Zhenzhu Xu, Huihui Lin and Chi Zhang\*<sup>a</sup>

*China-Australia Joint Research Centre for Functional Molecular Materials, School of Chemical & Material Engineering, Jiangnan University, Wuxi 214122, P. R. China*

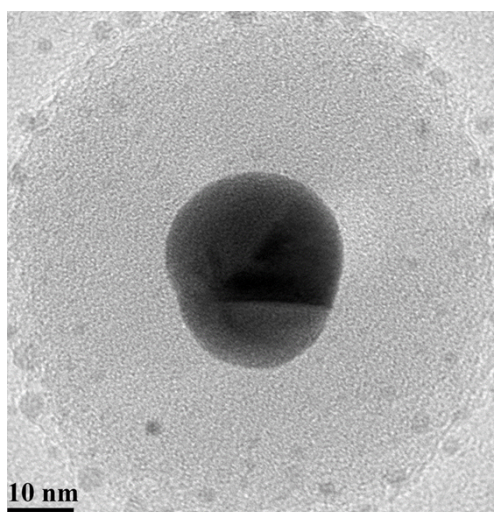

**Fig S1.** The typical TEM image of as-prepared Au/SiO<sub>2</sub>/Ag<sub>2</sub>S nanocomposites.

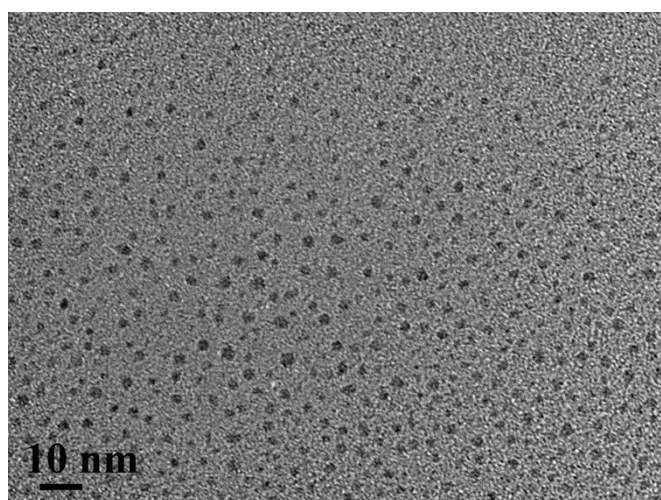

**Fig. S2** The typical TEM image of as-prepared Ag<sub>2</sub>S NCs; the average size was  $1.9 \pm 0.6$  nm.

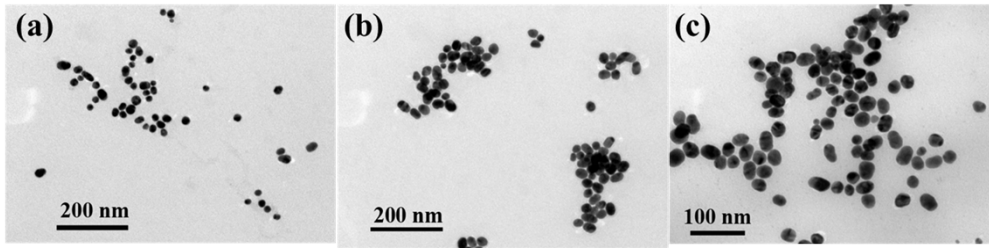

**Fig. S3** TEM images of Au NPs with various size: (a)  $17 \pm 2.1$  nm; (b)  $25 \pm 1.8$  nm; (c)  $28 \text{ nm} \pm 2.7$  nm

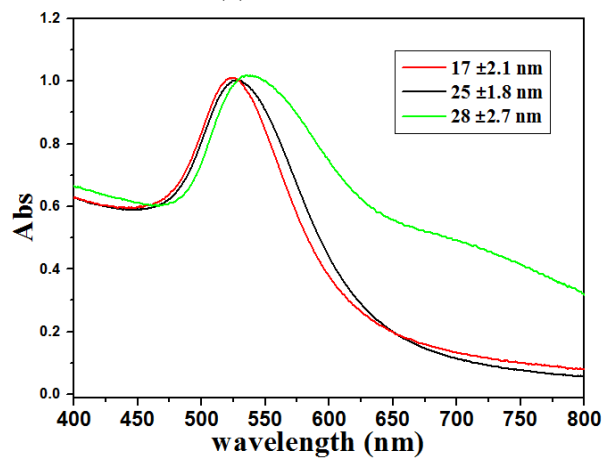

**Fig. S4** The UV-vis spectra of different sized AuNPs

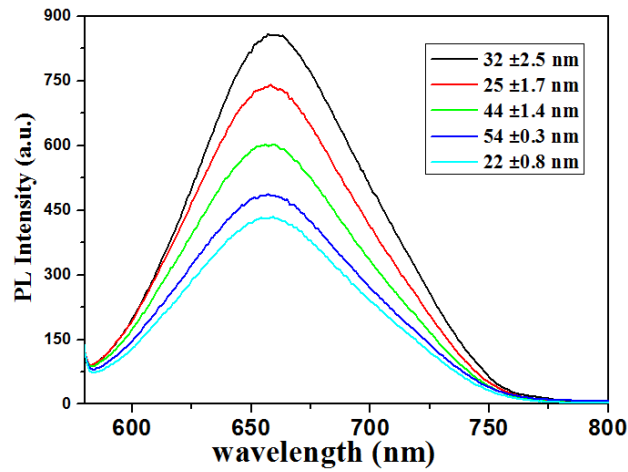

**Fig. S5** Photoluminescence spectra of the different thickness of the nanocomposites
